# Supplementary material
Source: publisher site journal article supplement (https://www.dovepress.com/get_supplementary_file.php?f=supplementary_file_1_56046.pdf)
Supplement: Supplementary file 1 [file get_supplementary_file.php]

| ligand                                             | P-gp inhibition |
|----------------------------------------------------|-----------------|
| (11-Me-Leu)-Cyclosporin A                          | 1               |
| 1,2,3,4-Tetrahydro-1-methyl-6,7-isoquinolinediol   | 0               |
| 1,2,3,4-Tetrahydro-6,7-dimethoxy-isoquinoline      | 0               |
| 1,2,3,4-Tetrahydro-isoquinoline                    | 0               |
| 1,3,5-Triazacycloheptane 4b                        | 1               |
| 1,3,5-Triazacycloheptane 4c                        | 1               |
| 1,3,5-Triazacycloheptane 5b                        | 1               |
| 1,3,5-Triazacycloheptane 5c                        | 1               |
| 1,3,5-Triazacycloheptane 5d                        | 1               |
| 1,3,5-Triazacycloheptane 6b                        | 1               |
| 1,3,5-Triazacycloheptane 6c                        | 1               |
| 1-(3-methoxyphenyl)-N,N-dimethylmethanamine        | 0               |
| 1-(4-chlorbenzhydryl)piperazine                    | 0               |
| 1-Benzyl-3-pyrroline                               | 0               |
| 1-Benzylimidazole                                  | 0               |
| 1-Phenethylpiperidine                              | 0               |
| 1-Phenylpiperazine                                 | 0               |
| 11-Deoxycortisol                                   | 1               |
| 14-Benzoylyohimbine                                | 1               |
| 16-Dehydroprogesterone                             | 1               |
| 16-Methylprogesterone                              | 1               |
| 17-Hydroxypregnenolone                             | 0               |
| 17-Hydroxyprogesterone                             | 1               |
| 2,2'-Diphenylethylamine                            | 0               |
| 2,4,6,8-Tetradieethano                             | 0               |
| 2,4,6,8-Tetramopholin                              | 0               |
| 2,4,6,8-Tetrapiperidy                              | 0               |
| 2,4,6-Trimorpholinepy                              | 0               |
| 2,4,8-Trimorpholinepy                              | 0               |
| 2-Benzylpyridine                                   | 0               |
| 2-Chloro-10-[2-(dimethylamino)ethyl] phenothiazine | 1               |
| 2-Chloro-10-[4-(dimethylamino)butyl] phenothiazine | 1               |
| 2-Chloroimipramine                                 | 1               |
| 2-Oxazolidinone                                    | 0               |
| 3'-4'-Dichlorobenzamil                             | 0               |
| 3,8-Dihydroxychlorpromazine                        | 0               |
| 3-Methyl choroquine                                | 1               |
| 4,8-Dipiperidyl-2,6-D                              | 0               |
| 4,8-Dipiperidyl-2,6-M                              | 0               |
| 4,8-Dipiperidyl-Dimet                              | 0               |
| 4-(2-Dimethylamino)ethyl)morpholine                | 0               |
| 4-Androstene-3,17-dione                            | 1               |
| 4-Hydroxytamoxifen                                 | 1               |
| 4-Hydroxytoremifene                                | 1               |
| 4-Iodotamoxifen                                    | 1               |
| 4-beta-Phorbol 12,13-dibutyrate                    | 1               |
| 4-beta-Phorbol 13-acetate                          | 0               |
| 4-beta-Phorbol 13-butyrate                         | 0               |
| 5-(N,N-hexamethylene)amiloride                     | 0               |

|                                       |   |
|---------------------------------------|---|
| 5-(N-Methyl-N-isobutyl)amiloride      | 0 |
| 5-N-acetyl-8-demethylardeemin         | 1 |
| 5-N-acetylardeemin                    | 1 |
| 5-[N-Methyl-N-(tert-butyl)]-amiloride | 0 |
| 6-Phenyl-2,4,7-pterid                 | 0 |
| 7,8-Dihydroxychlorpromazine           | 0 |
| 7-Hydroxychlorpromazine               | 0 |
| AF-1393                               | 1 |
| AG-1112                               | 0 |
| AG-213                                | 0 |
| AG-690                                | 1 |
| AHC-52                                | 1 |
| AHR 06601                             | 1 |
| AHR 16462                             | 1 |
| AHR-16303                             | 1 |
| AN-989                                | 1 |
| AY 9944                               | 1 |
| Acapriazine                           | 0 |
| Acebutolol                            | 0 |
| Acecaïnide                            | 0 |
| Acepromazine                          | 1 |
| Aceprometazine                        | 1 |
| Acetophenazine                        | 1 |
| Acridine                              | 0 |
| Acridone-4-carboxamide 22             | 1 |
| Acridone-4-carboxamide 23             | 1 |
| Acridone-4-carboxamide 24             | 1 |
| Acridone-4-carboxamide 28             | 1 |
| Acridone-4-carboxamide 29             | 1 |
| Acridone-4-carboxamide 30             | 1 |
| Acridone-4-carboxamide 31             | 1 |
| Acridone-4-carboxamide 32             | 1 |
| Acridone-4-carboxamide 36             | 1 |
| Acridone-4-carboxamide 39             | 1 |
| Acridone-4-carboxamide 43             | 1 |
| Acridone-4-carboxamide 44             | 1 |
| Acridone-4-carboxamide 47             | 1 |
| Acridone-4-carboxamide 48             | 1 |
| Acridone-4-carboxamide 49             | 1 |
| Acridone-4-carboxamide 50             | 1 |
| Acridone-4-carboxamide 51             | 1 |
| Acridone-4-carboxamide 52             | 1 |
| Acridone-4-carboxamide 53             | 1 |
| Acridone-4-carboxamide 54             | 1 |
| Acridone-4-carboxamide 55             | 1 |
| Acridone-4-carboxamide 59             | 1 |
| Acridone-4-carboxamide 60             | 1 |
| Acridone-4-carboxamide 61             | 1 |
| Acridone-4-carboxamide 64             | 1 |
| Acridone-4-carboxamide 65             | 1 |

|                           |   |
|---------------------------|---|
| Acridone-4-carboxamide 66 | 1 |
| Acridone-4-carboxamide 67 | 1 |
| Acridone-4-carboxamide 68 | 1 |
| Acridone-4-carboxamide 69 | 1 |
| Acridone-4-carboxamide 70 | 1 |
| Acridone-4-carboxamide 71 | 1 |
| Acridone-4-carboxamide 72 | 1 |
| Acridone-4-carboxamide 73 | 1 |
| Acridone-4-carboxamide 74 | 1 |
| Acridone-4-carboxamide 75 | 1 |
| Acridone-4-carboxamide 76 | 1 |
| Acridone-4-carboxamide 77 | 1 |
| Acridone-4-carboxamide 78 | 1 |
| Acridone-4-carboxamide 79 | 1 |
| Acridone-4-carboxamide 80 | 1 |
| Acridone-4-carboxamide 81 | 1 |
| Acridone-4-carboxamide 82 | 1 |
| Acridone-4-carboxamide 83 | 1 |
| Acridone-4-carboxamide 85 | 1 |
| Acrivastine               | 0 |
| Actinomycin D             | 0 |
| Adiphenine                | 0 |
| Aldicarb                  | 0 |
| Aldoxycarb                | 0 |
| Aldrich 21430-2           | 1 |
| Almitrine                 | 1 |
| Alpertine                 | 1 |
| Alpha-Tocopherol          | 0 |
| Alprenolol                | 1 |
| Alverine                  |   |
| Amantadine                | 0 |
| Ambodryl                  | 0 |
| Amiloride                 | 0 |
| Aminocarb                 | 0 |
| Aminopentamide            | 0 |
| Amiodarone                | 1 |
| Amitriptyline             | 1 |
| Amlodipine                | 1 |
| Amodiaquin                | 0 |
| Amotriphene               | 1 |
| Amoxapine                 | 1 |
| Amoxecaine                | 0 |
| Amperozide                | 1 |
| Amphotericin B            | 0 |
| Amprenavir                | 1 |
| Androstenedione           | 1 |
| Androsterone              | 1 |
| Antazoline                | 0 |
| Antenolol                 | 0 |
| Antipyrine                | 0 |

|                              |   |
|------------------------------|---|
| Apomorphine                  | 0 |
| Aprindine                    | 1 |
| Ascorbic acid                | 0 |
| Asocainol                    | 1 |
| Astemizole                   | 1 |
| Atorvastatin (methyl ester)  | 1 |
| Atorvastatin lactone         | 1 |
| Atrazine                     | 0 |
| Atropine                     | 0 |
| Aureobasidin A (ABA)         | 1 |
| Azaclorazine                 | 1 |
| Azaconazole                  | 0 |
| Azaperone                    | 0 |
| Azelastine                   | 1 |
| Azidopine                    | 1 |
| Azidoprocaïnamide methoïdide | 0 |
| Azipramine                   | 1 |
| B3-243                       | 1 |
| B669                         | 1 |
| B9109-012                    | 1 |
| BIBW 22                      | 1 |
| BW 1019W91                   | 1 |
| BW 1136U89                   | 1 |
| BW 1288U89                   | 1 |
| BW 1351W91                   | 1 |
| BW 1379W91                   | 1 |
| BW 565C81                    | 1 |
| Bamipine                     | 0 |
| Barnidipine                  | 1 |
| Befuraline                   | 0 |
| Benactyzine                  | 0 |
| Bencyclane                   | 0 |
| Benidipine                   | 1 |
| Benzathine                   | 1 |
| Benzmalecene                 | 0 |
| Benzofuran derivative 2a     | 0 |
| Benzofuran derivative 2c     | 1 |
| Benzofuran derivative 2d     | 1 |
| Benzofuran derivative 2e     | 1 |
| Benzofuran derivative 2f     | 1 |
| Benzquinamide                | 0 |
| Benztropine                  | 1 |
| Bepriđil                     | 1 |
| Berberine                    | 0 |
| Bevantolol                   | 1 |
| Bifonazole                   | 1 |
| Biperiden                    | 0 |
| Biphenamine                  | 0 |
| Biricodar                    | 1 |
| Bisobrin                     | 0 |

|                          |   |
|--------------------------|---|
| Bleomycin A2             | 0 |
| Boldine                  | 0 |
| Boxidine                 | 0 |
| Bromocriptine            | 1 |
| Brompheniramine          | 0 |
| Bryostatin               | 0 |
| Bucainide                | 1 |
| Buclizine                | 1 |
| Budipine                 |   |
| Buflomedil               | 0 |
| Bufuralol                | 1 |
| Bunaftine                | 1 |
| Buspirone                | 1 |
| Butalamine               | 0 |
| Butaperazine             | 1 |
| Buterizine               | 1 |
| Butethamate              | 0 |
| CP-100356                | 1 |
| CP-101556                | 1 |
| CP-114416                | 1 |
| CP-114769                | 1 |
| CP-117227                | 1 |
| CP-12379                 | 1 |
| CP-141938                | 1 |
| CP-147478                | 1 |
| CP-69042                 | 1 |
| Calcimycin               | 0 |
| Calphostin C             | 1 |
| Captodiame               |   |
| Carbamazepine            | 0 |
| Carbaryl                 | 0 |
| Carbinoxamine            | 1 |
| Carbiphene               | 1 |
| Carnitine                | 0 |
| Caroverine               | 1 |
| Carphenazine             | 1 |
| Carvedilol               | 1 |
| Carvedilol metabolite M2 | 0 |
| Carvedilol metabolite M4 | 0 |
| Carvedilol metabolite M5 | 0 |
| Catharanthine            | 1 |
| Cefoperazone             | 0 |
| Cefotetan                | 0 |
| Ceftazidime              | 0 |
| Celiprolol               | 0 |
| Cepharanthine            | 1 |
| Cephradine               | 0 |
| Cetiedil                 | 1 |
| Cetrizine                | 0 |
| Chelerythrine            | 0 |

|                  |   |
|------------------|---|
| Chlophedianol    | 0 |
| Chloracyzine     | 1 |
| Chlorbenzoxamine | 1 |
| Chlorcyclizine   | 0 |
| Chlorogenic acid | 0 |
| Chloropyramine   | 0 |
| Chloroquine      | 0 |
| Chlorpheniramine | 0 |
| Chlorphenoxamine |   |
| Chlorproethazine | 1 |
| Chlorpromazine   | 1 |
| Chlorprothixene  | 1 |
| Chlorzoxazone    | 0 |
| Chromonar        |   |
| Cimetidine       | 0 |
| Cinchonidine     | 1 |
| Cinepaxadil      | 1 |
| Cinepazet        | 0 |
| Cinepazic acid   | 0 |
| Cinepazide       | 0 |
| Cinnarizine      | 1 |
| Cinprazole       | 1 |
| Cinpropazide     | 0 |
| Cintriamide      | 0 |
| Cinuperone       | 1 |
| Ciprofloxacin    | 0 |
| Citalopram       | 0 |
| Citatepine       | 1 |
| Citenamide       | 0 |
| Clamoxyquin      | 0 |
| Clanobutin       | 0 |
| Clebopride       | 0 |
| Clemastine       | 1 |
| Clemizole        | 1 |
| Cletoquine       | 0 |
| Clobutinol       | 0 |
| Clocinazine      | 1 |
| Clomestron       | 0 |
| Clomiphene       | 0 |
| Clomipramine     | 1 |
| Clonidine        | 0 |
| Clopenthixol     | 1 |
| Cloperastine     | 1 |
| Clopimozide      | 1 |
| Clopipazan       | 1 |
| Clothiapine      | 1 |
| Clothixamide     | 1 |
| Clotrimazole     | 1 |
| Colchicine       | 0 |
| Colforsin        | 1 |

|                     |   |
|---------------------|---|
| Coralyne            | 0 |
| Corticosterone      | 0 |
| Cortisone           | 0 |
| Corynanthine        | 1 |
| Coumaphos           | 1 |
| Cryptophycin        | 1 |
| Cyclobenzaprine     | 1 |
| Cyclofenazine       | 1 |
| Cyclopeptolide(1)   | 0 |
| Cyclopeptolide(11)  | 0 |
| Cyclopeptolide(12a) | 1 |
| Cyclopeptolide(12b) | 1 |
| Cyclopeptolide(15a) | 1 |
| Cyclopeptolide(15b) | 1 |
| Cyclopeptolide(16a) | 1 |
| Cyclopeptolide(16c) | 1 |
| Cyclopeptolide(16h) | 1 |
| Cyclopeptolide(18)  | 1 |
| Cyclopeptolide(19)  | 0 |
| Cyclopeptolide(2a)  | 1 |
| Cyclopeptolide(2c)  | 1 |
| Cyclopeptolide(2f)  | 1 |
| Cyclopeptolide(3a)  | 1 |
| Cyclopeptolide(3c)  | 1 |
| Cyclopeptolide(3f)  | 1 |
| Cyclopeptolide(3g)  | 1 |
| Cyclopeptolide(3h)  | 1 |
| Cyclopeptolide(3i)  | 1 |
| Cyclopeptolide(3j)  | 1 |
| Cyclopeptolide(3l)  | 1 |
| Cyclopeptolide(3n)  | 1 |
| Cyclopeptolide(4)   | 1 |
| Cyclopeptolide(7)   | 1 |
| Cyclopeptolide(8)   | 1 |
| Cyclopeptolide(9)   | 1 |
| Cyclophenazine      | 1 |
| Cyclosporin A       | 1 |
| Cyclosporin C       | 1 |
| Cyclosporin G       | 1 |
| Cypermethrin        | 1 |
| Cyproheptadine      | 1 |
| Cytochalasin A      | 0 |
| Cytochalasin C      | 0 |
| Cytochalasin D      | 0 |
| Cytochalasin E      | 1 |
| Cytochalasin H      | 0 |
| Cytochalasin J      | 0 |
| D490                | 1 |
| D525                | 1 |
| D528                | 0 |

|                           |   |
|---------------------------|---|
| D557                      | 1 |
| D559                      | 1 |
| D595                      | 1 |
| D784                      | 1 |
| D894                      | 1 |
| DDE                       | 0 |
| DDT                       | 0 |
| DHP-014                   | 1 |
| DMDP                      | 1 |
| DPDPE                     | 0 |
| Dagapamil                 | 1 |
| Danitracen                | 0 |
| Dapiprazole               | 0 |
| Darodipine                | 1 |
| Debrisoquin               | 0 |
| Dehydroemetine            | 0 |
| Delavirdine               | 1 |
| Delfantrine               | 0 |
| Deltorphan II             | 0 |
| Denzimol                  | 0 |
| Deoxycorticosterone       | 1 |
| Desethylamiodarone        | 1 |
| Desipramine               | 1 |
| Desmethoxyangonin         | 1 |
| Desmethylazelastine       | 1 |
| Desmethylchlorpromazine   | 0 |
| Desmethylcitalopram       | 0 |
| Desmethylsertraline       | 1 |
| Devapamil                 | 1 |
| Dexamethasone             | 0 |
| Dexniguldipine            | 1 |
| Dialifos                  | 0 |
| Dibenzylamine             | 0 |
| Dibozan                   | 0 |
| Dibucaine                 | 1 |
| Dicapthon                 | 1 |
| Diclofensine              | 0 |
| Didesmethylchlorpromazine | 0 |
| Diethylaniline            | 0 |
| Diethylstilbestrol        | 1 |
| Difloxacin                | 0 |
| Difluanine                | 1 |
| Digoxin                   | 0 |
| Dihydroergotamine         | 0 |
| Dihydromethysticin        | 1 |
| Dihydropyridine DP11      | 1 |
| Dihydropyridine DP5       | 1 |
| Dihydropyridine DP6       | 1 |
| Dihydropyridine DP7       | 1 |
| Dihydropyridine DP9       | 1 |



|                                   |   |
|-----------------------------------|---|
| Dihydropyrroloquinoline series 14 | 0 |
| Dihydropyrroloquinoline series 27 | 1 |
| Diisopromine                      |   |
| Dilazep                           | 1 |
| Diltiazem                         | 1 |
| Dimethindene                      | 1 |
| Diosmetin                         | 0 |
| Diosmin                           | 0 |
| Diphenamid                        | 0 |
| Diphenazoline                     | 0 |
| Diphenidol                        | 1 |
| Diphenylpyraline                  | 1 |
| Disopyramide                      | 0 |
| Dixyrazine                        | 1 |
| Dobutamine                        | 0 |
| Doconazole                        | 1 |
| Domperidone                       | 0 |
| Doxapram                          | 1 |
| Doxazosin                         |   |
| Doxepine                          | 1 |
| Doxorubicin                       | 0 |
| Doxylamine                        | 0 |
| Drobuline                         | 1 |
| Drofenine                         | 0 |
| Droloxifen                        | 0 |
| Droprenilamine                    | 1 |
| Droproizine                       | 0 |
| Duoperone                         | 1 |
| EKI-785                           | 1 |
| Ebastine                          | 1 |
| Econazole                         | 0 |
| Efonidipine                       | 1 |
| Eletriptan                        | 0 |
| Eltoprazine                       | 0 |
| Emepronium                        | 0 |
| Emetine                           | 0 |
| Emopamil                          | 1 |
| Enciprazine                       | 1 |
| Endosulfan                        | 1 |
| Enilconazole                      | 0 |
| Enoxacin                          | 0 |
| Epinephrine                       | 0 |
| Eprazinone                        | 1 |
| Eprozinol                         | 1 |
| Equilenine                        | 0 |
| Equilin                           | 0 |
| Ergocristine                      | 1 |
| Ergocryptine                      | 1 |
| Ergonovine                        | 0 |
| Ergotamine                        | 1 |

|                       |   |
|-----------------------|---|
| Erythromycin          | 1 |
| Estradiol             | 0 |
| Estriol               | 0 |
| Estrone               | 0 |
| Etafenone             | 1 |
| Ethylbenztropine      | 1 |
| Ethylbenzylaniline    | 0 |
| Etifelmin             | 0 |
| Etodroxizine          |   |
| Etolotifene           | 1 |
| Etomidoline           | 1 |
| Etoposide             | 0 |
| Euphodendroidin A     | 1 |
| Euphodendroidin B     | 1 |
| Euphodendroidin C     | 1 |
| Euphodendroidin D     | 1 |
| Euphodendroidin E     | 1 |
| Euphodendroidin G     | 1 |
| Euphodendroidin H     | 1 |
| Euphodendroidin I     | 1 |
| Euprocine             | 1 |
| Falipamil             | 0 |
| Famciclovir           | 0 |
| Farnesyl analog AFCA  | 1 |
| Farnesyl analog AFCMA | 1 |
| Farnesyl analog AFCME | 1 |
| Febuverine            | 1 |
| Felodipine            | 1 |
| Fenbutrazate          | 1 |
| Fendiline             | 1 |
| Fenoctimine           | 0 |
| Fenoterol             | 0 |
| Fenoxedil             | 1 |
| Fenpipramide          | 0 |
| Fenpiverinium         | 0 |
| Fenticonazole         | 1 |
| Fenvalerate           | 0 |
| Fexofenadine          | 0 |
| Filipin               | 0 |
| Fisetin               | 0 |
| Flavonoid ID 13       | 1 |
| Flavonoid ID 21       | 0 |
| Flavonoid ID 22       | 0 |
| Flavonoid ID 23       | 0 |
| Flavonoid ID 24       | 0 |
| Flavonoid ID 37       | 1 |
| Flavonoid ID 38       | 0 |
| Fleroxacin            | 0 |
| Flesinoxan            | 0 |
| Flezelastine          | 1 |

|                     |   |
|---------------------|---|
| Flordipine          | 1 |
| Fluanisone          | 1 |
| Fluazifop-butyl     | 0 |
| Fluconazole         | 0 |
| Flumazenil          | 0 |
| Flunarizine         | 1 |
| Fluoxetine          | 1 |
| Fluperamide         | 1 |
| Fluperlapine        | 1 |
| Fluphenazine        | 1 |
| Flurazepam          | 1 |
| Fluspirilene        | 1 |
| Fluvoxamine         | 1 |
| GF120918            | 1 |
| GGCME               | 1 |
| GW 420867           | 1 |
| Gallopamil          | 1 |
| Gamfexine           | 0 |
| Geldanamycin        | 1 |
| Geldanamycin 17-AAG | 1 |
| Gepirone            | 0 |
| Ginsenoside Rg3     | 1 |
| Ginsenoside Rh2     | 1 |
| Glaucine            | 1 |
| Gramine             | 0 |
| Guanabenz           | 0 |
| Guanfacine          | 0 |
| H-7                 | 0 |
| H-89                | 1 |
| HA-1004             | 0 |
| HDL-2722            | 0 |
| Halopemide          | 1 |
| Haloperidol         | 1 |
| Hepzidine           | 1 |
| Hexadiline          | 0 |
| Hexobendine         | 1 |
| Hexoprenaline       | 0 |
| Histapyrodine       | 0 |
| Hoechst 33342       | 0 |
| Homochlorocyclizine | 0 |
| Homofenazine        |   |
| Homoveratrylamine   | 0 |
| Hoquizil            | 0 |
| Hydramethylnon      | 1 |
| Hydrastine          | 0 |
| Hydrocotarnine      | 0 |
| Hydromorphone       | 0 |
| Hydroxyzine         | 1 |
| Hyperforin          | 0 |
| Idarubicin          | 1 |

|                            |   |
|----------------------------|---|
| Imatinib                   | 1 |
| Imiclopazine               | 0 |
| Imipramine                 | 1 |
| Imolamine                  | 0 |
| Imoxiterol                 | 0 |
| Indinavir                  | 0 |
| Indomethacin               | 0 |
| Isoconazole                | 1 |
| Isoniazid                  | 0 |
| Isopromethazine            | 1 |
| Isoxsuprine                | 0 |
| Isradipine                 | 1 |
| Itraconazole               |   |
| Ivermectin Bla             | 1 |
| Jatrophane diterpene(7)    | 1 |
| Jatrophane diterpenoid(1)  | 1 |
| Jatrophane diterpenoid(10) | 1 |
| Jatrophane diterpenoid(11) | 1 |
| Jatrophane diterpenoid(12) | 1 |
| Jatrophane diterpenoid(13) | 1 |
| Jatrophane diterpenoid(14) | 1 |
| Jatrophane diterpenoid(15) | 1 |
| Jatrophane diterpenoid(16) | 1 |
| Jatrophane diterpenoid(2)  | 1 |
| Jatrophane diterpenoid(3)  | 1 |
| Jatrophane diterpenoid(5)  | 1 |
| Jatrophane diterpenoid(6)  | 1 |
| Jatrophane diterpenoid(8)  | 1 |
| Jatrophane diterpenoid(9)  | 1 |
| K02                        | 1 |
| Keoxifene                  | 0 |
| Ketamine                   | 0 |
| Ketoconazole               | 1 |
| Ketotifen                  | 1 |
| LR 764                     | 0 |
| LU43918                    | 1 |
| LU46324                    | 1 |
| LU47474                    | 1 |
| LU48895                    | 1 |
| LU49667                    | 1 |
| LU49940                    | 1 |
| LU51903                    | 1 |
| LY18947                    | 0 |
| LY292540                   | 1 |
| LY296097                   | 1 |
| LY335979                   | 1 |
| LY335983                   | 1 |
| LY350344                   | 1 |
| Labetalol                  | 0 |
| Laudanosine                | 1 |

|                         |   |
|-------------------------|---|
| Laudanosoline           | 0 |
| Lenperone               | 1 |
| Levodopa                | 0 |
| Levophacetoperane       | 0 |
| Lidocaine               | 0 |
| Lidoflazine             | 1 |
| Linadryl                | 1 |
| Lindane                 | 0 |
| Lobeline                | 1 |
| Lombazole               |   |
| Loperamide              | 1 |
| Lopinavir               | 1 |
| Loratadine              | 1 |
| Lorcainide              | 1 |
| Losartan                | 0 |
| Lovastatin acid         | 0 |
| Lovastatin lactone      | 1 |
| Loxapine                | 1 |
| Luteolin                | 0 |
| Luteolin-4'-O-glucoside | 0 |
| MA 1499                 | 1 |
| MA 1509                 | 1 |
| MA 1510                 | 1 |
| MA 1586                 | 1 |
| MA 1588                 | 1 |
| MA 1598                 | 1 |
| MA 1813                 | 1 |
| MA 1862                 | 0 |
| MA 1865                 | 0 |
| MA 1880                 | 0 |
| MDL 6792                |   |
| MDL-10393               |   |
| MDL8917V                | 1 |
| MDR reversal agent 15h  | 1 |
| MDR reversal agent 15i  | 1 |
| MDR reversal agent 15m  | 1 |
| MDR reversal agent 15o  | 1 |
| MDR reversal agent 15u  | 1 |
| MDR reversal agent 15x  | 1 |
| MDR reversal agent 28a  | 1 |
| MDR reversal agent 28c  | 1 |
| MDR reversal agent 35a  | 1 |
| MDR reversal agent 35d  | 1 |
| MDR reversal agent 37b  | 1 |
| MER37                   | 1 |
| MK-571                  | 0 |
| MM36                    | 1 |
| MS-209                  | 1 |
| Macbecin II             | 1 |
| Manidipine              | 1 |

|                             |   |
|-----------------------------|---|
| Mannitol                    | 0 |
| Maprotiline                 | 1 |
| Maroxepine                  | 0 |
| Mebendazole                 | 1 |
| Mebeverine                  | 1 |
| Meclizine                   | 1 |
| Mecloxamine                 | 0 |
| Medroxyprogesterone         | 1 |
| Medroxyprogesterone acetate | 1 |
| Mefloquine                  | 1 |
| Megestrol Acetate           | 1 |
| Meglitinide                 | 0 |
| Memotine                    | 0 |
| Mephentermine               | 0 |
| Mephénytoin                 | 0 |
| Mepramidil                  | 1 |
| Meprobamate                 | 0 |
| Mequitazine                 | 1 |
| Mesoridazine                | 1 |
| Mesuprine                   | 0 |
| Metergoline                 | 1 |
| Methadone                   | 1 |
| Methaphenilene              | 0 |
| Methdilazine                | 0 |
| Methixene                   | 0 |
| Methomyl                    | 0 |
| Methotrimeprazine           | 1 |
| Methoxychlor                | 0 |
| Methoxypromazine            |   |
| Methyl Cellosolve Acetate   | 0 |
| Methylamine                 | 0 |
| Methysergide                | 0 |
| Methysticin                 | 1 |
| Metiapine                   | 1 |
| Metoclopramide              | 0 |
| Metofenazate                | 1 |
| Metopimazine                | 0 |
| Metoprolol                  | 0 |
| Metoserpate                 | 1 |
| Metoxepin                   | 1 |
| Mevinphos                   | 0 |
| Mexilitene                  | 0 |
| Mezilamine                  | 0 |
| Mianserin                   | 0 |
| Mibefradil                  | 1 |
| Miconazole                  | 0 |
| Midazolam                   | 1 |
| Mifepristone (RU486)        | 1 |
| Milenperone                 | 1 |
| Milipertine                 | 1 |

|                                            |   |
|--------------------------------------------|---|
| Mioflazine                                 | 1 |
| Mirex                                      | 0 |
| Mitomycin C                                | 0 |
| Mitoxantrone                               | 0 |
| Mixidine                                   | 0 |
| Moclobemide                                | 0 |
| Monensin                                   | 1 |
| Mopidamol                                  | 0 |
| Morin                                      | 0 |
| Morphine                                   | 0 |
| Motracetam                                 | 0 |
| Moxapridine                                | 1 |
| N,N'-Diphenyl-p-phenylenediamine           | 0 |
| N,N'-dibenzylethylene diamine              | 0 |
| N,N-Bis(alkanol)amine aryl ester analog 21 | 1 |
| N,N-Bis(alkanol)amine aryl ester analog 5  | 0 |
| N,N-Bis(alkanol)amine aryl ester analog 6  | 1 |
| N,N-Bis(alkanol)amine aryl ester analog 8  | 1 |
| N,N-Bis(alkanol)amine aryl ester analog 9  | 1 |
| N,N-Dimethylbenzylamine                    | 0 |
| N,N-bis(cyclohexanol)amine aryl ester (3)  | 1 |
| N,N-bis(cyclohexanol)amine aryl ester (4)  | 1 |
| N,N-bis-arylalkylamine derivative(1)       | 1 |
| N,N-bis-arylalkylamine derivative(2)       | 1 |
| N,N-diethylcyclohexylamine                 | 0 |
| N-Benzylbenzamide                          | 0 |
| N-Methyl-gallopamil                        | 0 |
| N-Norlaudanosine                           | 1 |
| N-Norlaudanoline                           | 0 |
| N-Phenyl-1-naphthylamine                   | 0 |
| N-Phenyl-2-naphthylamine                   | 0 |
| N-acetyl-daunorubicin                      | 1 |
| N-acyloxy-1,4-dihydropyridine(10)          | 1 |
| N-acyloxy-1,4-dihydropyridine(5)           | 1 |
| N-acyloxy-1,4-dihydropyridine(6)           | 1 |
| N-acyloxy-1,4-dihydropyridine(7)           | 1 |
| N-acyloxy-1,4-dihydropyridine(8)           | 1 |
| N-acyloxy-1,4-dihydropyridine(9)           | 1 |
| N-desmethyl-toremifene                     | 1 |
| N-desmethyl-venlafaxine                    | 1 |
| N-desmethyltamoxifen                       | 1 |
| N-trialkylglycine N31214C                  | 1 |
| NK-101                                     | 0 |
| NK-106                                     | 1 |
| NSC 102843                                 | 1 |
| NSC 169647                                 | 0 |
| NSC 220202                                 | 1 |
| NSC 303594                                 | 1 |
| NSC 30774                                  | 1 |
| NSC 33128                                  | 1 |

|               |   |
|---------------|---|
| NSC 344003    | 1 |
| NSC 359449    | 0 |
| NSC 633043    | 0 |
| NSC 633320    | 0 |
| NSC 640085    | 0 |
| NSC 648114    | 1 |
| NSC 649087    | 1 |
| NSC 665333    | 1 |
| NSC 666490    | 0 |
| NSC 667739    | 1 |
| NSC 668360    | 1 |
| NSC 673413    | 0 |
| NSC 676590    | 1 |
| NSC 676591    | 1 |
| NSC 676600    | 1 |
| NSC 676605    | 1 |
| NSC 88116     | 0 |
| NSC 88657     | 0 |
| NSC 94907     | 0 |
| Nafcillin     | 0 |
| Nafiverine    | 1 |
| Nafoxidine    | 1 |
| Naftifine     | 0 |
| Naftopidil    | 1 |
| Naftoxate     | 1 |
| Nalbuphine    | 0 |
| Naloxone      | 0 |
| Naltrexone    | 0 |
| Naltrindole   | 0 |
| Nefazodone    | 1 |
| Nelfinavir    | 1 |
| Neostigmine   | 0 |
| Nicardipine   | 1 |
| Nicergoline   | 1 |
| Nifedipine    | 1 |
| Nilprazole    | 1 |
| Niludipine    | 1 |
| Nimodipine    | 1 |
| Nisoldipine   | 1 |
| Nitrazepam    | 0 |
| Nitrendipine  | 1 |
| Nitromifene   | 1 |
| Nobiletin     | 1 |
| Nomifensine   | 0 |
| Nordazepam    | 0 |
| Norfloxacin   | 0 |
| Norfluxetine  | 1 |
| Norgallopamil | 1 |
| Nortriptylene | 1 |
| Norverapamil  | 1 |



|                         |   |
|-------------------------|---|
| Noscapine               | 1 |
| Nuclotixene             | 0 |
| Nylidrin                | 0 |
| O-desmethyl-venlafaxine | 0 |
| OBF-1622                | 0 |
| OBF-1822                | 1 |
| OBF-1834                | 0 |
| OC144-093               | 1 |
| OL-57                   | 1 |
| Ofloxacin               | 0 |
| Oleanolic acid          | 0 |
| Olivomycin A            | 0 |
| Omeprazole              | 1 |
| Omeprazole sulfone      | 0 |
| Omoconazole             | 0 |
| Opipramol               | 0 |
| Opromazine              | 1 |
| Orconazole              |   |
| Oxamarin                | 0 |
| Oxatomide               | 1 |
| Oxiconazole             | 0 |
| Oxolinic acid           | 0 |
| Oxprenolol              | 0 |
| Oxybutynin              | 1 |
| Oxyfedrine              | 0 |
| Oxypendyl               | 0 |
| Oxyperomide             | 0 |
| Oxypertine              | 1 |
| PAK-1                   | 1 |
| PAK-200                 | 1 |
| PAK-8                   | 0 |
| PGP-4008                | 1 |
| Palmitoylcartinine      | 0 |
| Papaverine              | 0 |
| Paraquat                | 0 |
| Parathion-methyl        | 1 |
| Parconazole             | 0 |
| Paroxetine              | 1 |
| Pefloxacin              | 0 |
| Penfluridol             | 1 |
| Pentachlorophenol       | 0 |
| Pentazocine             | 1 |
| Peptoid 1               | 1 |
| Peptoid 2               | 1 |
| Peradoxime              | 1 |
| Perafensine             | 0 |
| Perazine                |   |
| Perhexilline            | 0 |
| Perimetazine            | 1 |
| Perlapine               | 1 |

|                   |   |
|-------------------|---|
| Perphenazine      | 1 |
| Phenethylamine    | 0 |
| Pheniramine       | 0 |
| Phenoxazine ID 11 | 1 |
| Phenoxazine ID 12 | 1 |
| Phenoxazine ID 15 | 0 |
| Phenoxazine ID 18 | 1 |
| Phenoxazine ID 2  | 1 |
| Phenoxazine ID 3  | 1 |
| Phenoxazine ID 4  | 1 |
| Phenoxazine ID 5  | 1 |
| Phenylamil        | 1 |
| Phenyltoloxamine  | 0 |
| Phenytoin         | 0 |
| Phorbol           | 0 |
| Phosmet           | 0 |
| Physostigmine     | 1 |
| Pifarnine         | 1 |
| Piflutixol        | 1 |
| Pimethixene       | 1 |
| Pimozide          | 1 |
| Pinafide          | 0 |
| Pinoxepine        | 1 |
| Pipamperone       | 1 |
| Pipemidic Acid    | 0 |
| Piperacetazine    |   |
| Piperamide        | 0 |
| Piperdimerine A   | 1 |
| Piperine          | 1 |
| Pipoxizine        | 1 |
| Pipoxolan         | 0 |
| Pirenzepine       | 0 |
| Pirohenptine      | 1 |
| Piromidic Acid    | 0 |
| Pirprofen         | 0 |
| Pizotyline        | 1 |
| Pramiverin        | 0 |
| Pravastatin       | 0 |
| Prazosin          | 1 |
| Predifine         | 1 |
| Pregnanedione     | 1 |
| Preoverine        | 0 |
| Prenoxidiazine    | 1 |
| Prenylamine       | 1 |
| Primaquine        | 0 |
| Primidolol        | 0 |
| Prinixic acid     | 0 |
| Pristinamycin IA  | 1 |
| Proadifen         | 1 |
| Prochlorperazine  | 1 |

|                              |   |
|------------------------------|---|
| Procyclidine                 | 1 |
| Prodipine                    |   |
| Progabide                    | 1 |
| Progesterone                 | 1 |
| Promazine                    | 0 |
| Promethazine                 | 1 |
| Propafenone                  | 1 |
| Propafenone derivative 1b    | 1 |
| Propafenone derivative 1c    | 1 |
| Propafenone derivative 1e    | 1 |
| Propafenone derivative 1f    | 1 |
| Propafenone derivative 1g    | 1 |
| Propafenone derivative 1i    | 1 |
| Propafenone derivative 1k    | 1 |
| Propafenone derivative GP01  | 1 |
| Propafenone derivative GP02  | 1 |
| Propafenone derivative GP03  | 0 |
| Propafenone derivative GP05  | 1 |
| Propafenone derivative GP07  | 0 |
| Propafenone derivative GP10  | 0 |
| Propafenone derivative GP134 | 1 |
| Propafenone derivative GP155 | 1 |
| Propafenone derivative GP159 | 1 |
| Propafenone derivative GP163 | 1 |
| Propafenone derivative GP164 | 1 |
| Propafenone derivative GP17  | 0 |
| Propafenone derivative GP240 | 1 |
| Propafenone derivative GP29  | 1 |
| Propafenone derivative GP31  | 1 |
| Propafenone derivative GP339 | 1 |
| Propafenone derivative GP358 | 1 |
| Propafenone derivative GP359 | 1 |
| Propafenone derivative GP360 | 1 |
| Propafenone derivative GP366 | 1 |
| Propafenone derivative GP381 | 1 |
| Propafenone derivative GP388 | 1 |
| Propafenone derivative GP389 | 0 |
| Propafenone derivative GP46  | 0 |
| Propafenone derivative GP57  | 1 |
| Propafenone derivative GP62  | 1 |
| Propafenone derivative GP88  | 1 |
| Propafenone derivative GP90  | 1 |
| Propafenone derivative ID 16 | 1 |
| Propafenone derivative ID 17 | 1 |
| Propafenone derivative ID 19 | 1 |
| Propafenone derivative ID 20 | 1 |
| Propafenone derivative ID 21 | 1 |
| Propafenone derivative ID 22 | 1 |
| Propafenone derivative ID 23 | 1 |
| Propafenone derivative ID 24 | 1 |

|                              |   |
|------------------------------|---|
| Propafenone derivative ID 28 | 1 |
| Propafenone derivative ID 29 | 1 |
| Propafenone derivative ID 36 | 1 |
| Propafenone derivative ID 37 | 1 |
| Propafenone derivative ID 38 | 1 |
| Propafenone derivative ID 39 | 1 |
| Propafenone derivative ID 40 | 1 |
| Propafenone derivative ID 7b | 1 |
| Propantheline                | 0 |
| Propenzolate                 | 1 |
| Propericiazine               | 0 |
| Propiconazole                | 0 |
| Propoxur                     | 0 |
| Propoxyphene                 | 1 |
| Propranolol                  | 1 |
| Prothipendyl                 | 0 |
| Protokylol                   | 0 |
| Protriptyline                | 1 |
| Proxazole                    | 0 |
| Prozapine                    |   |
| Purine analog ID 17          | 1 |
| Purine analog ID 18          | 1 |
| Purine analog ID 24          | 1 |
| Purine analog ID 26          | 1 |
| Purine analog ID 28          | 1 |
| Purine analog ID 3           | 1 |
| Purine analog ID 32          | 1 |
| Purine analog ID 4           | 1 |
| Purine analog ID 5           | 1 |
| Purine analog ID 7           | 1 |
| Purine analog ID 8           | 1 |
| Purine analog ID 9           | 1 |
| Puromycin                    | 0 |
| Pyrathiazine                 | 1 |
| Pyrilamine                   | 0 |
| Quinacrine                   | 1 |
| Quinazosin                   | 0 |
| Quinidine                    | 1 |
| Quinupramine                 | 1 |
| Quipazine                    | 0 |
| R40 500                      | 1 |
| R41300                       | 1 |
| R42164                       | 1 |
| R49960                       |   |
| R59022                       |   |
| R6033                        | 1 |
| RA-134                       | 1 |
| RA-14                        | 1 |
| RA-158                       | 0 |
| RA-159                       | 0 |

|                |   |
|----------------|---|
| RA-168         | 1 |
| RA-17          | 0 |
| RA-171         | 1 |
| RA-178         | 1 |
| RA-19          | 1 |
| RA-198         | 0 |
| RA-24          | 1 |
| RA-3           | 0 |
| RA-4           | 0 |
| RA-8           | 1 |
| RA-83          | 0 |
| RE-244         | 1 |
| RE-28          | 1 |
| RE-34          | 0 |
| RE-38          | 1 |
| RE-57          | 1 |
| RE-61          | 1 |
| RE-62          | 1 |
| RE-66          | 0 |
| RXRA-160       |   |
| RXRA-642       | 1 |
| RXRA-69        | 1 |
| RXRE-104       | 1 |
| RXRE-61        | 0 |
| RXRE-62        | 0 |
| RXRE-63        | 1 |
| Racefemine     | 1 |
| Racemethorphan | 0 |
| Ranitidine     | 0 |
| Razinodil      | 1 |
| Reboxetine     | 1 |
| Rescinnamine   | 1 |
| Reserpine acid | 0 |
| Reserpine      | 1 |
| Revenast       | 1 |
| Reversin 121   | 1 |
| Reversin 205   | 1 |
| Rhoifolin      | 0 |
| Rifampin       | 1 |
| Rifamycin B    | 0 |
| Rifamycin SV   | 0 |
| Rilapine       | 1 |
| Risperidone    | 1 |
| Ritodrine      | 0 |
| Ritonavir      | 1 |
| Ro 4-1284      | 1 |
| Ro-04-2249     | 1 |
| Ro-04-2250     | 1 |
| Ro-04-2285     | 1 |
| Ro-04-2287     | 1 |

|                    |   |
|--------------------|---|
| Ro-04-2359         | 1 |
| Ro-04-2360         | 1 |
| Ro-04-2669         | 1 |
| Ro11-2933          | 1 |
| Rolitetracline     | 0 |
| Ropitoin           | 1 |
| Ropizine           | 1 |
| Roxithromycin      | 1 |
| Rythmol            | 1 |
| S 9788             | 1 |
| S-Farnesylcysteine | 0 |
| S76 5200           | 1 |
| S78 5780           |   |
| S78 5781           | 1 |
| S79 0491           | 1 |
| S79 0671           | 1 |
| S79 1099           | 1 |
| S79 1100           | 1 |
| S79 2823           | 1 |
| S81 0337           | 1 |
| S81 0339           | 1 |
| S81 1951           | 1 |
| S83 4096           | 1 |
| S83 4163           | 1 |
| SCH66336           | 1 |
| SDZ-PSC 833        | 1 |
| SKF-16467          | 1 |
| SKF-3301           |   |
| SNC 121            | 0 |
| SPS 1768           | 0 |
| SPS 1769           | 1 |
| SPS 1770           | 1 |
| SPS 1772           | 1 |
| SPS 1773           | 1 |
| SPS 1774           | 1 |
| SPS 1775           | 1 |
| SPS 1776           | 1 |
| SPS 1777           | 1 |
| SPS 1778           | 1 |
| SPS 1779           | 1 |
| SPS 1793           | 1 |
| SPS 1835           | 1 |
| SPS 1836           | 0 |
| SPS 1837           | 0 |
| SPS 1838           | 1 |
| SPS 1839           | 1 |
| SPS 1840           | 1 |
| SPS 1841           | 0 |
| SPS 1842           | 1 |
| SPS 1843           | 1 |

|                   |   |
|-------------------|---|
| SPS 1844          | 1 |
| SPS 1845          | 1 |
| SPS 1846          | 1 |
| SPS 1847          |   |
| SPS 1848          | 0 |
| SPS 1849          | 1 |
| SPS 1850          | 1 |
| SPS 1852          | 1 |
| SPS 1853          | 1 |
| SPS 1854          | 1 |
| SZ48              | 1 |
| Safingol          | 0 |
| Salmeterol        |   |
| Salverine         | 0 |
| Saquinavir        | 1 |
| Scopolamine       | 0 |
| Secoverine        | 1 |
| Selegiline        | 0 |
| Selparazine       | 1 |
| Sertraline        | 1 |
| Sesquiterpene(1)  | 1 |
| Sesquiterpene(11) | 1 |
| Sesquiterpene(12) | 1 |
| Sesquiterpene(13) | 1 |
| Sesquiterpene(14) | 1 |
| Sesquiterpene(8)  | 1 |
| Setastine         | 1 |
| Silybin           | 1 |
| Simetride         | 1 |
| Simvastatin acid  | 0 |
| Sirolimus         | 1 |
| Sitagliptin       | 0 |
| Solanesol         | 0 |
| Solypertine       | 1 |
| Spasmadryl        | 0 |
| Spiramide         | 1 |
| Spirilene         | 1 |
| Strophanthidin    | 0 |
| Sulconazole       | 0 |
| Sulfasalazine     | 0 |
| Sulfinpyrazone    | 0 |
| Sulforidazine     | 1 |
| Suloctidil        | 0 |
| Sumatriptan       | 0 |
| Suramin           | 0 |
| Syrosingopine     | 1 |
| T13               | 1 |
| TMB8              | 1 |
| TPP               | 0 |
| TRX-13            | 0 |

|                           |   |
|---------------------------|---|
| Tacrine                   | 0 |
| Tacrolimus                | 1 |
| Talinolol                 | 0 |
| Tamoxifen                 | 1 |
| Tampramine                | 1 |
| Tangeretin                | 1 |
| Tefludazine               | 1 |
| Telithromycin             | 1 |
| Terbinafine               | 0 |
| Terconazole               | 1 |
| Terfenadine               | 1 |
| Terodiline                | 1 |
| Teroxalene                | 1 |
| Testosterone              | 1 |
| Tetrabenazine             | 0 |
| Tetrahydroquinoline ID 2a | 1 |
| Tetrahydroquinoline ID 2b | 1 |
| Tetrahydroquinoline ID 2f | 1 |
| Tetrahydroquinoline ID 2g | 1 |
| Tetrahydroquinoline ID 3f | 1 |
| Tetrahydroquinoline ID 3g | 1 |
| Tetraphenylphosphonium    | 0 |
| Thalicarpine              | 1 |
| Thenaldine                | 0 |
| Thenyldiamine             | 0 |
| Thiethylperazine          | 1 |
| Thiopropazine             | 1 |
| Thioridazine              | 1 |
| Thonzylamine              | 0 |
| Tiapamil                  | 1 |
| Tiaramide                 | 0 |
| Tilorone                  | 0 |
| Tilozepine                | 1 |
| Tioconazole               | 0 |
| Tiodazosin                | 0 |
| Tioperidone               | 1 |
| Tiopropamine              |   |
| Tiprenolol                | 0 |
| Tipropidil                | 0 |
| Tixadil                   | 0 |
| Tolamolol                 | 0 |
| Tolnapersine              | 1 |
| Tolpropamine              |   |
| Tolyporphin A             | 1 |
| Toprilidine               | 1 |
| Toremifene                | 1 |
| Trazodone                 | 1 |
| Tretoquinol               | 0 |
| Tri-n-butylmethylamminium | 0 |
| Triazine derivative ID 11 | 1 |



|                           |   |
|---------------------------|---|
| Triazine derivative ID 12 | 1 |
| Triazine derivative ID 15 | 1 |
| Triazine derivative ID 16 | 1 |
| Triazine derivative ID 17 | 1 |
| Triazine derivative ID 18 | 1 |
| Triazine derivative ID 20 | 1 |
| Triazine derivative ID 21 | 1 |
| Triazine derivative ID 22 | 1 |
| Triazine derivative ID 23 | 1 |
| Triazine derivative ID 24 | 1 |
| Triazine derivative ID 25 | 1 |
| Triazine derivative ID 26 | 1 |
| Triazine derivative ID 30 | 1 |
| Triazine derivative ID 32 | 1 |
| Triazine derivative ID 33 | 1 |
| Triazine derivative ID 34 | 1 |
| Triazine derivative ID 35 | 1 |
| Triazine derivative ID 36 | 1 |
| Triazine derivative ID 37 | 1 |
| Triazine derivative ID 38 | 1 |
| Triazine derivative ID 39 | 1 |
| Triazine derivative ID 40 | 1 |
| Triazine derivative ID 42 | 1 |
| Triazine derivative ID 44 | 1 |
| Triazine derivative ID 45 | 1 |
| Triazine derivative ID 46 | 1 |
| Triazine derivative ID 47 | 1 |
| Triazine derivative ID 54 | 1 |
| Triazine derivative ID 57 | 1 |
| Triazine derivative ID 6  | 1 |
| Triazine derivative ID 7  | 1 |
| Triazine derivative ID 8  | 1 |
| Triazine derivative ID 9  | 1 |
| Triazolam                 | 0 |
| Trifluoperazine           | 1 |
| Trifluoperidol            | 1 |
| Triflupromazine           | 1 |
| Triforine                 | 0 |
| Trihexyphenidyl           | 0 |
| Trimazosin                | 0 |
| Trimebutine               | 1 |
| Trimeprazine              | 0 |
| Trimethoprim              | 0 |
| Trimetozine               | 0 |
| Trimipramine              | 1 |
| Triparanol                | 1 |
| Tripelennamine            | 0 |
| Triprolidine              | 1 |
| Tropirine                 | 1 |
| Troxonium                 | 0 |

|                                     |   |
|-------------------------------------|---|
| Trypan blue                         | 0 |
| Tryptanmine                         | 0 |
| Tryptophan                          | 0 |
| Tubulzole                           | 0 |
| U-69593                             | 0 |
| U10520A                             | 1 |
| U11555A                             | 0 |
| U18666A                             | 1 |
| UCB-26166                           | 1 |
| UCB-26359                           | 1 |
| UCB-J028                            | 0 |
| UCB-L172                            | 1 |
| UCB-N101                            | 1 |
| Urapidil                            | 0 |
| Valinomycin                         | 1 |
| Vancomycin                          | 0 |
| Venlafaxine                         | 0 |
| Verapamil                           | 1 |
| Verapamil analogue(19)              | 1 |
| Verapamil analogue(2)               | 1 |
| Verapamil analogue(25)              | 1 |
| Verapamil analogue(29)              | 1 |
| Verapamil analogue(4)               | 1 |
| Verapamil analogue(5)               | 1 |
| Vetrabutine                         | 1 |
| Vinblastine                         | 1 |
| Vinclozolin                         | 0 |
| Vincristine                         | 0 |
| Vindoline                           | 1 |
| Vitamin A palmitate                 | 0 |
| W-12                                | 0 |
| W-13                                | 0 |
| W-7                                 | 0 |
| W2795                               | 0 |
| W8-032                              | 1 |
| Warfarin                            | 0 |
| XR9051                              | 1 |
| XR9576                              | 1 |
| Xenthiorate                         | 0 |
| Zimeldine                           | 0 |
| Zipeprol                            | 1 |
| Zolamine                            | 0 |
| Zolertine                           | 0 |
| Zolmitriptan                        | 0 |
| Zoloperone                          | 0 |
| Zolpidem                            | 1 |
| Zomepirac                           | 0 |
| cis-Flupentixol                     | 1 |
| cis-Thiothixene                     | 1 |
| o-Nitrophenyl N,N-dimethylcarbamate | 0 |

**1-P-gp inhibitor**

**0-P-gp non-inhibitor**
